# Supplementary material for: Structural analysis of glycoprotein sialylation – Part I: pre-LC-MS analytical strategies
Source: Royal Society of Chemistry journal article supplement (doi:10.1039/c3ra42960a), 2013-01-01
Supplement: c3ra42960a.pdf [file c3ra42960a.pdf]

**Supplementary Figure S1:** Timeline highlighting significant discoveries for structural understanding of sialic acids. The year assigned to each technique is referred to the first publication reported in Pubmed (<http://www.ncbi.nlm.nih.gov/pubmed/>). To search for a specific technique applied to sialic acid detection, a combination of keywords was used. For example, the first report of HPLC applied to sialic acids detection was retrieved using the following keywords: “sialic acid\*[Title/Abstract]) AND HPLC\*[Title/Abstract]”. In square brackets are reported the number of publications, up to date, that contain the specified keywords. a) The radioactive metabolic labeling and metabolic labling with unnatural sialic acids are reported with the same number of publications.

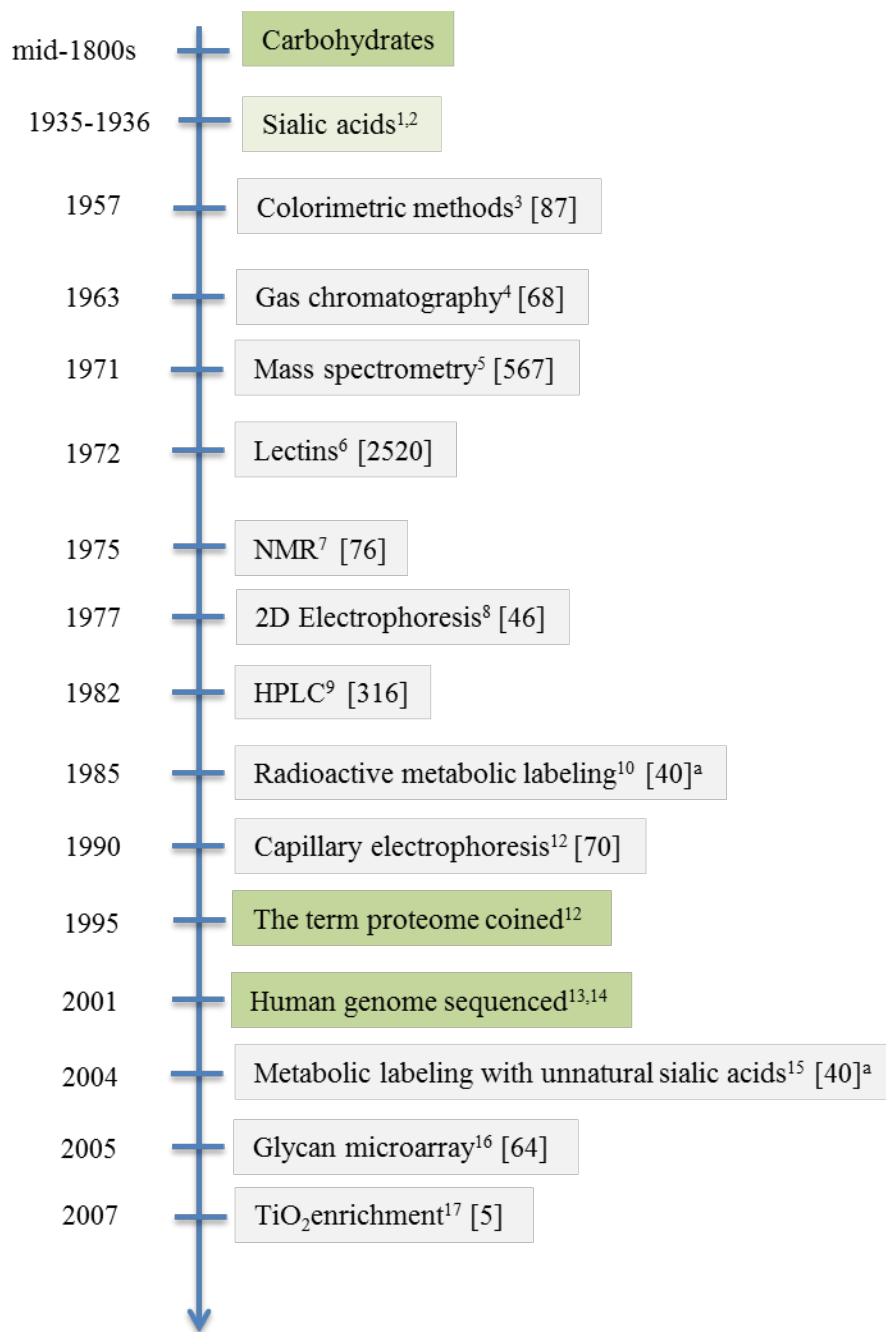

## References:

1. Klenk, E., *Über die Natur der Phosphatide und anderer Lipide des Gehirns und der Leber bei der Niemann-Pick'schen Krankheit*. Zeitschrift für Physiologische Chemie, 1935. **235**: p. 24-25.
2. Blix, G., *Über die Kohlenhydratgruppen des Submaxillarismucins*. Hoppe-Seyler's Zeitschrift für physiologische Chemie, 1936. **240**: p. 43-54.
3. Svennerholm, L., *Quantitative estimation of sialic acids. II. A colorimetric resorcinol-hydrochloric acid method*. Biochim Biophys Acta, 1957. **24**(3): p. 604-11.
4. Tettamanti, G., et al., *[Identification by Gas-Chromatography of the Glycolic Acid Content of Sialic Acids of Various Origins]*. Boll Soc Ital Biol Sper, 1963. **39**: p. 1878-81.
5. Dawson, G. and C.C. Sweeley, *Mass spectrometry of neutral, mono- and disialoglycosphingolipids*. J Lipid Res, 1971. **12**(1): p. 56-64.
6. Culp, L.A. and P.H. Black, *Contact-inhibited revertant cell lines isolated from simian virus 40-transformed cells. 3. Concanavalin A-selected revertant cells*. J Virol, 1972. **9**(4): p. 611-20.
7. Bhattacharjee, A.K., et al., *Structural determination of the sialic acid polysaccharide antigens of Neisseria meningitidis serogroups B and C with carbon 13 nuclear magnetic resonance*. J Biol Chem, 1975. **250**(5): p. 1926-32.
8. Wada, H.G., Z. Gornicki, and H.H. Sussman, *The sialoglycoprotein subunits of human placental brush border membranes characterized by two-dimensional electrophoresis*. J Supramol Struct, 1977. **6**(4): p. 473-84.
9. Kundu, S.K. and D.D. Scott, *Rapid separation of gangliosides by high-performance liquid chromatography*. J Chromatogr, 1982. **232**(1): p. 19-27.
10. Diaz, S. and A. Varki, *Metabolic labeling of sialic acids in tissue culture cell lines: methods to identify substituted and modified radioactive neuraminic acids*. Anal Biochem, 1985. **150**(1): p. 32-46.
11. Wu, S.L., et al., *Use of high-performance capillary electrophoresis to monitor charge heterogeneity in recombinant-DNA derived proteins*. J Chromatogr, 1990. **516**(1): p. 115-22.
12. Wasinger, V.C., et al., *Progress with gene-product mapping of the Mollicutes: Mycoplasma genitalium*. Electrophoresis, 1995. **16**(7): p. 1090-4.
13. Venter, J.C., et al., *The sequence of the human genome*. Science, 2001. **291**(5507): p. 1304-51.
14. Lander, E.S., et al., *Initial sequencing and analysis of the human genome*. Nature, 2001. **409**(6822): p. 860-921.
15. Agard, N.J., J.A. Prescher, and C.R. Bertozzi, *A strain-promoted [3 + 2] azide-alkyne cycloaddition for covalent modification of biomolecules in living systems*. J Am Chem Soc, 2004. **126**(46): p. 15046-7.
16. Angeloni, S., et al., *Glycoprofiling with micro-arrays of glycoconjugates and lectins*. Glycobiology, 2005. **15**(1): p. 31-41.
17. Larsen, M.R., et al., *Exploring the sialome using titanium dioxide chromatography and mass spectrometry*. Mol Cell Proteomics, 2007. **6**(10): p. 1778-87.
